# Supplementary material for: Laboratory selection of Aedes aegypti field populations with the organophosphate malathion: Negative impacts on resistance to deltamethrin and to the organophosphate temephos
Source: PubMed Central journal article supplement (PMC6128625; doi:10.1371/journal.pntd.0006734), 2018-08-20
Supplement: pntd.0006734.s003.pdf [file pntd.0006734.s003.pdf]

Malathion (larvae)

| population | sample | generation | LC <sub>50</sub><br>(mg/L) | LC <sub>95</sub><br>(mg/L) | confidence intervals    |                         | RR <sub>50</sub> | RR <sub>95</sub> | SR <sub>50</sub> | SR <sub>95</sub> | slope |
|------------|--------|------------|----------------------------|----------------------------|-------------------------|-------------------------|------------------|------------------|------------------|------------------|-------|
|            |        |            |                            |                            | LC <sub>50</sub> (mg/L) | LC <sub>95</sub> (mg/L) |                  |                  |                  |                  |       |
| Rock       | .-.    | .-.        | 0.049                      | 0.088                      | 0.04799 < LC < 0.05058  | 0.08438 < LC < 0.09259  | 1.0              | 1.0              | .-.              | .-.              | 6.5   |
| Aracaju    | P      | F2         | 0.094                      | 0.213                      | 0.09142 < LC < 0.09741  | 0.21254 < LC < 0.22242  | 2.6              | 2.9              | 1.0              | 1.0              | 4.7   |
|            | C1     | F7         | 0.120                      | 0.231                      | 0.11608 < LC < 0.12366  | 0.22036 < LC < 0.24261  | 2.4              | 2.6              | 1.3              | 1.1              | 5.8   |
|            | C2     |            | 0.111                      | 0.221                      | 0.10786 < LC < 0.11502  | 0.21086 < LC < 0.23243  | 2.3              | 2.5              | 1.2              | 1.0              | 5.5   |
|            | S1     | F7         | 0.121                      | 0.273                      | 0.11592 < LC < 0.12540  | 0.25585 < LC < 0.29130  | 2.5              | 3.1              | 1.3              | 1.3              | 4.6   |
|            | S2     |            | 0.172                      | 0.357                      | 0.16647 < LC < 0.17769  | 0.33785 < LC < 0.37651  | 3.5              | 4.0              | 1.8              | 1.7              | 5.2   |
|            | S3     |            | 0.141                      | 0.339                      | 0.13487 < LC < 0.14754  | 0.32034 < LC < 0.35847  | 2.9              | 3.8              | 1.5              | 1.6              | 4.3   |
| Crato      | P      | F2         | 0.086                      | 0.207                      | 0.08350 < LC < 0.08928  | 0.19702 < LC < 0.21668  | 2.4              | 2.8              | 1.0              | 1.0              | 4.3   |
|            | C1     | F6         | 0.112                      | 0.234                      | 0.10824 < LC < 0.11576  | 0.22182 < LC < 0.24612  | 2.3              | 2.6              | 1.3              | 1.1              | 5.2   |
|            | C2     |            | 0.106                      | 0.220                      | 0.10238 < LC < 0.10962  | 0.20900 < LC < 0.23147  | 2.2              | 2.5              | 1.2              | 1.1              | 5.2   |
|            | S1     | F7         | 0.262                      | 0.519                      | 0.25458 < LC < 0.27055  | 0.49096 < LC < 0.54918  | 5.3              | 5.9              | 3.0              | 2.5              | 5.6   |
|            | S2     |            | 0.232                      | 0.454                      | 0.22495 < LC < 0.23923  | 0.43227 < LC < 0.47663  | 4.7              | 5.1              | 2.7              | 2.2              | 5.6   |
|            | S3     |            | 0.235                      | 0.470                      | 0.22601 < LC < 0.24499  | 0.44554 < LC < 0.49628  | 4.8              | 5.3              | 2.7              | 2.3              | 5.5   |
