# Supplementary material for: Laboratory selection of Aedes aegypti field populations with the organophosphate malathion: Negative impacts on resistance to deltamethrin and to the organophosphate temephos
Source: PubMed Central journal article supplement (PMC6128625; doi:10.1371/journal.pntd.0006734), 2018-08-20
Supplement: pntd.0006734.s004.pdf [file pntd.0006734.s004.pdf]

Malathion (adults)

| population | sample | generation | LC <sub>50</sub><br>(g/L) | LC <sub>95</sub> (g/L) | confidence intervals   |                        | RR <sub>50</sub> | RR <sub>95</sub> | SR <sub>50</sub> | SR <sub>95</sub> | slope |
|------------|--------|------------|---------------------------|------------------------|------------------------|------------------------|------------------|------------------|------------------|------------------|-------|
|            |        |            |                           |                        | LC <sub>50</sub> (g/L) | LC <sub>95</sub> (g/L) |                  |                  |                  |                  |       |
| Rock       | .-.    | .-.        | 0.186                     | 0.257                  | 0.18223 < LC < 0.19058 | 0.24829 < LC < 0.26660 | 1.0              | 1.0              | .-.              | .-.              | 11.7  |
| Aracaju    | P      | F1         | 0.294                     | 0.522                  | 0.27786 < LC < 0.31058 | 0.48529 < LC < 0.56057 | 1.6              | 1.8              | 1.0              | 1.0              | 6.6   |
|            | C1     | F7         | 0.320                     | 0.630                  | 0.29833 < LC < 0.34304 | 0.56280 < LC < 0.70528 | 1.7              | 2.5              | 1.1              | 1.2              | 5.6   |
|            | C2     |            | 0.303                     | 0.661                  | 0.28087 < LC < 0.32600 | 0.58213 < LC < 0.74958 | 1.6              | 2.6              | 1.0              | 1.3              | 4.9   |
|            | S1     | F7         | 0.342                     | 0.612                  | 0.32491 < LC < 0.35981 | 0.55591 < LC < 0.67349 | 1.8              | 2.4              | 1.2              | 1.2              | 6.5   |
|            | S2     |            | 0.380                     | 0.695                  | 0.36195 < LC < 0.39871 | 0.62586 < LC < 0.77146 | 2.0              | 2.7              | 1.3              | 1.3              | 6.3   |
|            | S3     |            | 0.357                     | 0.610                  | 0.34149 < LC < 0.37415 | 0.55820 < LC < 0.66653 | 1.9              | 2.4              | 1.2              | 1.2              | 7.1   |
| Crato      | P      | F3         | 0.299                     | 0.606                  | 0.27089 < LC < 0.30218 | 0.56495 < LC < 0.64953 | 1.6              | 2.0              | 1.0              | 1.0              | 5.0   |
|            | C1     | F6         | 0.339                     | 0.685                  | 0.31655 < LC < 0.36227 | 0.61311 < LC < 0.76575 | 1.8              | 2.7              | 1.1              | 1.1              | 5.4   |
|            | C2     |            | 0.347                     | 0.648                  | 0.32671 < LC < 0.36804 | 0.57556 < LC < 0.73051 | 1.9              | 2.5              | 1.2              | 1.1              | 6.1   |
|            | S1     | F7         | 0.458                     | 0.823                  | 0.43701 < LC < 0.47985 | 0.74136 < LC < 0.91359 | 2.5              | 3.2              | 1.5              | 1.4              | 6.5   |
|            | S2     |            | 0.466                     | 0.960                  | 0.44267 < LC < 0.49157 | 0.86888 < LC < 1.06041 | 2.5              | 3.7              | 1.6              | 1.6              | 5.3   |
|            | S3     |            | 0.419                     | 0.871                  | 0.39320 < LC < 0.44749 | 0.78748 < LC < 0.96324 | 2.3              | 3.4              | 1.4              | 1.4              | 5.2   |
