# Supplementary material for: Laboratory selection of Aedes aegypti field populations with the organophosphate malathion: Negative impacts on resistance to deltamethrin and to the organophosphate temephos
Source: PubMed Central journal article supplement (PMC6128625; doi:10.1371/journal.pntd.0006734), 2018-08-20
Supplement: pntd.0006734.s005.pdf [file pntd.0006734.s005.pdf]

Temephos

| population | sample | generation | LC <sub>50</sub><br>(mg/L) | LC <sub>95</sub><br>(mg/L) | confidence intervals    |                         | RR <sub>50</sub> | RR <sub>95</sub> | SR <sub>50</sub> | SR <sub>95</sub> | slope |
|------------|--------|------------|----------------------------|----------------------------|-------------------------|-------------------------|------------------|------------------|------------------|------------------|-------|
|            |        |            |                            |                            | LC <sub>50</sub> (mg/L) | LC <sub>95</sub> (mg/L) |                  |                  |                  |                  |       |
| Rock       | .-.    | .-.        | 0.005                      | 0.008                      | 0.00524 < LC < 0.00537  | 0.00820 < LC < 0.00857  | 1.0              | 1.0              | .-.              | .-.              | 8.3   |
| Aracaju    | P      | F1         | 0.040                      | 0.098                      | 0.03858 < LC < 0.04107  | 0.09273 < LC < 0.10286  | 11.2             | 12.9             | 1.0              | 1.0              | 4.2   |
|            | C1     | F7         | 0.046                      | 0.096                      | 0.04465 < LC < 0.04760  | 0.09138 < LC < 0.10113  | 8.7              | 11.5             | 1.2              | 1.0              | 5.2   |
|            | C2     |            | 0.044                      | 0.108                      | 0.04254 < LC < 0.04591  | 0.10150 < LC < 0.11532  | 8.3              | 12.9             | 1.1              | 1.1              | 4.2   |
|            | S1     | F7         | 0.031                      | 0.080                      | 0.02928 < LC < 0.03259  | 0.07510 < LC < 0.08623  | 5.8              | 9.6              | 0.8              | 0.8              | 4.0   |
|            | S2     |            | 0.040                      | 0.087                      | 0.03815 < LC < 0.04164  | 0.08139 < LC < 0.09202  | 7.5              | 10.3             | 1.0              | 0.9              | 4.9   |
|            | S3     |            | 0.045                      | 0.099                      | 0.04326 < LC < 0.04715  | 0.09301 < LC < 0.10476  | 8.5              | 11.8             | 1.1              | 1.0              | 4.8   |
| Crato      | P      | F2         | 0.048                      | 0.332                      | 0.04317 < LC < 0.05412  | 0.29850 < LC < 0.36883  | 23.2             | 64.8             | 1.0              | 1.0              | 2.0   |
|            | C1     | F6         | 0.102                      | 0.368                      | 0.09597 < LC < 0.10759  | 0.33782 < LC < 0.40069  | 19.1             | 43.9             | 2.1              | 1.1              | 2.9   |
|            | C2     |            | 0.071                      | 0.339                      | 0.06589 < LC < 0.07747  | 0.30658 < LC < 0.37542  | 13.5             | 40.4             | 1.5              | 1.0              | 2.4   |
|            | S1     | F7         | 0.043                      | 0.223                      | 0.03782 < LC < 0.04903  | 0.19976 < LC < 0.24943  | 8.1              | 26.6             | 0.9              | 0.7              | 2.3   |
|            | S2     |            | 0.048                      | 0.383                      | 0.04181 < LC < 0.05514  | 0.33816 < LC < 0.43440  | 9.1              | 45.7             | 1.0              | 1.2              | 1.8   |
|            | S3     |            | 0.066                      | 0.372                      | 0.05880 < LC < 0.07355  | 0.33274 < LC < 0.41584  | 12.4             | 44.3             | 1.4              | 1.1              | 2.2   |
