# Supplementary material for: Laboratory selection of Aedes aegypti field populations with the organophosphate malathion: Negative impacts on resistance to deltamethrin and to the organophosphate temephos
Source: PubMed Central journal article supplement (PMC6128625; doi:10.1371/journal.pntd.0006734), 2018-08-20
Supplement: pntd.0006734.s006.pdf [file pntd.0006734.s006.pdf]

**Diflubenzuron**

| population | sample | generation | EI <sub>50</sub> (µg/L) | EI <sub>95</sub> (µg/L) | confidence intervals    |                         | RR <sub>50</sub> | RR <sub>95</sub> | SR <sub>50</sub> | SR <sub>95</sub> | slope |
|------------|--------|------------|-------------------------|-------------------------|-------------------------|-------------------------|------------------|------------------|------------------|------------------|-------|
|            |        |            |                         |                         | EI <sub>50</sub> (µg/L) | EI <sub>95</sub> (µg/L) |                  |                  |                  |                  |       |
| Rock       | .-.    | .-.        | 1.717                   | 2.978                   | 1.64664 < LC < 1.78964  | 2.75355 < LC < 3.22043  | 1.0              | 1.0              | .-.              | .-.              | 6.9   |
| Aracaju    | P      | F1         | 1.574                   | 4.031                   | 1.49646 < LC < 1.65528  | 3.64624 < LC < 4.45778  | 1.6              | 1.7              | 1.0              | 1.0              | 4.0   |
|            | C1     | F7         | 2.364                   | 3.837                   | 2.26826 < LC < 2.46480  | 3.57900 < LC < 4.11358  | 1.4              | 1.3              | 1.5              | 1.0              | 7.8   |
|            | C2     |            | 2.131                   | 4.663                   | 2.01306 < LC < 2.25560  | 4.23165 < LC < 5.13764  | 1.2              | 1.6              | 1.4              | 1.2              | 4.8   |
|            | S1     | F7         | 2.322                   | 5.475                   | 2.19893 < LC < 2.45230  | 4.94692 < LC < 6.05879  | 1.4              | 1.8              | 1.5              | 1.4              | 4.4   |
|            | S2     |            | 2.419                   | 4.721                   | 2.32590 < LC < 2.51625  | 4.38859 < LC < 5.07868  | 1.4              | 1.6              | 1.5              | 1.2              | 5.7   |
|            | S3     |            | 2.675                   | 5.805                   | 2.54809 < LC < 2.80739  | 5.25405 < LC < 6.41321  | 1.6              | 1.9              | 1.7              | 1.4              | 4.9   |
| Crato      | P      | F2         | 2.002                   | 3.982                   | 1.91585 < LC < 2.09109  | 3.70419 < LC < 4.27966  | 1.6              | 1.9              | 1.0              | 1.0              | 5.5   |
|            | C1     | F6         | 2.164                   | 3.957                   | 2.06379 < LC < 2.26832  | 3.64920 < LC < 4.29096  | 1.3              | 1.3              | 1.1              | 1.0              | 6.3   |
|            | C2     |            | 2.006                   | 3.670                   | 1.91027 < LC < 2.10735  | 3.39976 < LC < 3.96193  | 1.2              | 1.2              | 1.0              | 0.9              | 6.3   |
|            | S1     | F7         | 2.511                   | 5.497                   | 2.39073 < LC < 2.63696  | 5.00953 < LC < 6.03289  | 1.5              | 1.9              | 1.3              | 1.4              | 4.8   |
|            | S2     |            | 3.083                   | 4.964                   | 2.97765 < LC < 3.19215  | 4.67612 < LC < 5.26874  | 1.8              | 1.7              | 1.5              | 1.2              | 7.9   |
|            | S3     |            | 2.724                   | 4.954                   | 2.60888 < LC < 2.84385  | 4.60621 < LC < 5.32709  | 1.6              | 1.7              | 1.4              | 1.2              | 6.3   |
