# Supplementary material for: Laboratory selection of Aedes aegypti field populations with the organophosphate malathion: Negative impacts on resistance to deltamethrin and to the organophosphate temephos
Source: PubMed Central journal article supplement (PMC6128625; doi:10.1371/journal.pntd.0006734), 2018-08-20
Supplement: pntd.0006734.s007.pdf [file pntd.0006734.s007.pdf]

Deltamethrin

| population | sample | generation | LC <sub>50</sub><br>(mg/L) | LC <sub>95</sub><br>(mg/L) | confidence intervals     |                            | RR <sub>50</sub> | RR <sub>95</sub> | SR <sub>50</sub> | SR <sub>95</sub> | slope |
|------------|--------|------------|----------------------------|----------------------------|--------------------------|----------------------------|------------------|------------------|------------------|------------------|-------|
|            |        |            |                            |                            | LC <sub>50</sub> (mg/L)  | LC <sub>95</sub> (mg/L)    |                  |                  |                  |                  |       |
| Rock       | .-.    | .-.        | 0.755                      | 2.717                      | 0.70248 < LC < 0.81079   | 2.36109 < LC < 3.12665     | 1.0              | 1.0              | .-.              | .-.              | 3.0   |
| Aracaju    | P      | F1         | 13.145                     | 37.784                     | 12.4253 < LC < 13.9069   | 33.5690 < LC < 42.5283     | 14.3             | 17.8             | 1.0              | 1.0              | 3.6   |
|            | C1     | F7         | 30.728                     | 163.599                    | 27.44590 < LC < 34.40363 | 126.26339 < LC < 211.97545 | 40.7             | 60.2             | 2.3              | 4.3              | 2.3   |
|            | C2     |            | 31.558                     | 245.824                    | 27.47851 < LC < 36.24265 | 172.37382 < LC < 350.57140 | 41.8             | 90.5             | 2.4              | 6.5              | 1.9   |
|            | S1     | F7         | 8.739                      | 62.534                     | 7.40299 < LC < 10.31635  | 48.27281 < LC < 81.00770   | 11.6             | 23.0             | 0.7              | 1.7              | 1.9   |
|            | S2     |            | 7.329                      | 46.761                     | 6.11714 < LC < 8.78209   | 37.61250 < LC < 58.13428   | 9.7              | 17.2             | 0.6              | 1.2              | 2.0   |
|            | S3     |            | 8.263                      | 44.664                     | 7.10054 < LC < 9.61691   | 36.47431 < LC < 54.69278   | 11.0             | 16.4             | 0.6              | 1.2              | 2.2   |
| Crato      | P      | F3         | 27.912                     | 140.201                    | 25.5326 < LC < 30.5141   | 120.1620 < LC < 163.5812   | 37.0             | 51.6             | 1.0              | 1.0              | 2.3   |
|            | C1     | F6         | 29.888                     | 247.729                    | 25.31606 < LC < 35.28678 | 175.14364 < LC < 350.39651 | 39.6             | 91.2             | 1.1              | 1.8              | 1.8   |
|            | C2     |            | 30.796                     | 204.656                    | 26.12587 < LC < 36.30162 | 151.93926 < LC < 275.66375 | 40.8             | 75.3             | 1.1              | 1.5              | 2.0   |
|            | S1     | F7         | 21.393                     | 95.144                     | 19.11348 < LC < 23.94396 | 76.67948 < LC < 118.05579  | 28.4             | 35.0             | 0.8              | 0.7              | 2.5   |
|            | S2     |            | 19.923                     | 111.709                    | 17.69118 < LC < 22.43599 | 88.21355 < LC < 141.46266  | 26.4             | 41.1             | 0.7              | 0.8              | 2.2   |
|            | S3     |            | 24.276                     | 102.520                    | 22.03141 < LC < 26.74946 | 84.02099 < LC < 125.09306  | 32.2             | 37.7             | 0.9              | 0.7              | 2.6   |
