# Supplementary material for: Laboratory selection of Aedes aegypti field populations with the organophosphate malathion: Negative impacts on resistance to deltamethrin and to the organophosphate temephos
Source: PubMed Central journal article supplement (PMC6128625; doi:10.1371/journal.pntd.0006734), 2018-08-20
Supplement: pntd.0006734.s008.pdf [file pntd.0006734.s008.pdf]

| population | sample | generation | 1016              |                     | 1534              |                     |
|------------|--------|------------|-------------------|---------------------|-------------------|---------------------|
|            |        |            | allelic frequency | genotypic frequency | allelic frequency | genotypic frequency |
| Aracaju    | (*)    | F0         | 0.52              | 0.30                | 0.62              | 0.43                |
|            | C1     | F7         | 0.42              | 0.10                | 0.65              | 0.40                |
|            | C2     |            | 0.38              | 0.10                | 0.48              | 0.20                |
|            | S1     |            | 0.36              | 0.07                | 0.47              | 0.13                |
|            | S2     | F7         | 0.33              | 0.07                | 0.50              | 0.27                |
|            | S3     |            | 0.35              | 0.07                | 0.60              | 0.30                |
| Crato      | (*)    | F2         | 0.17              | 0.03                | 0.55              | 0.31                |
|            | C1     | F6         | 0.20              | 0.00                | 0.53              | 0.23                |
|            | C2     |            | 0.05              | 0.00                | 0.33              | 0.17                |
|            | S1     |            | 0.19              | 0.00                | 0.47              | 0.13                |
|            | S2     | F7         | 0.18              | 0.03                | 0.50              | 0.13                |
|            | S3     |            | 0.17              | 0.07                | 0.50              | 0.37                |
