# Supplementary material for: Laboratory selection of Aedes aegypti field populations with the organophosphate malathion: Negative impacts on resistance to deltamethrin and to the organophosphate temephos
Source: PubMed Central journal article supplement (PMC6128625; doi:10.1371/journal.pntd.0006734), 2018-08-20
Supplement: pntd.0006734.s009.pdf [file pntd.0006734.s009.pdf]

| samples          |          |    | AChI           |                  | AChE |      | MFO |        | $\alpha$ -Est |        | $\beta$ -Est |        | pnpa-Est |       | GST |       |
|------------------|----------|----|----------------|------------------|------|------|-----|--------|---------------|--------|--------------|--------|----------|-------|-----|-------|
|                  |          |    | n <sup>1</sup> | med <sup>2</sup> | n    | med  | n   | med    | n             | med    | n            | med    | n        | med   | n   | med   |
| Aracaju (larvae) | Par      | F1 | 137            | 11.82            | 137  | 0.07 | 137 | 43.23  | 137           | 19.22  | 137          | 28.50  | 132      | 4.40  | 137 | 0.71  |
|                  | C1       | F7 | 85             | 10.53            | 85   | 0.05 | 85  | 48.89  | 85            | 20.05  | 85           | 25.49  | 76       | 3.22  | 85  | 0.70  |
|                  | C2       |    | 84             | 9.86             | 86   | 0.04 | 86  | 39.58  | 86            | 21.28  | 86           | 28.40  | 83       | 3.02  | 85  | 0.73  |
|                  | C1+C2    |    | 169            | 10.26            | 171  | 0.04 | 171 | 43.93  | 171           | 20.53  | 171          | 26.57  | 159      | 3.12  | 170 | 0.71  |
|                  | S1       | F7 | 80             | 11.62            | 80   | 0.06 | 79  | 31.28  | 80            | 14.08  | 80           | 24.81  | 78       | 3.74  | 80  | 0.88  |
|                  | S2       |    | 79             | 11.21            | 79   | 0.05 | 79  | 43.52  | 79            | 19.03  | 79           | 26.36  | 76       | 3.48  | 79  | 0.64  |
|                  | S3       |    | 77             | 10.02            | 79   | 0.05 | 80  | 43.86  | 79            | 16.48  | 80           | 30.87  | 64       | 2.97  | 80  | 0.67  |
|                  | S1+S2+S3 |    | 236            | 10.89            | 238  | 0.05 | 238 | 40.17  | 238           | 16.34  | 239          | 26.73  | 218      | 3.42  | 239 | 0.70  |
| Aracaju (adults) | Par      | F1 | 117            | 22.41            | 117  | 0.15 | 116 | 56.68  | 118           | 8.73   | 118          | 7.67   | 111      | 5.73  | 111 | 0.94  |
|                  | C1       | F7 | 67             | 15.91            | 69   | 0.14 | 69  | 80.62* | 68            | 7.11   | 69           | 6.17   | 61       | 4.79  | 69  | 1.50* |
|                  | C2       |    | 70             | 17.54            | 70   | 0.13 | 70  | 82.33* | 70            | 7.90   | 70           | 7.37   | 68       | 6.90  | 69  | 1.41* |
|                  | C1+C2    |    | 137            | 16.98            | 139  | 0.13 | 139 | 82.56* | 138           | 7.57   | 139          | 6.84   | 129      | 5.91  | 138 | 1.45* |
|                  | S1       | F7 | 65             | 14.25            | 65   | 0.15 | 64  | 68.12* | 65            | 6.99   | 59           | 6.18   | 62       | 5.67  | 63  | 1.23* |
|                  | S2       |    | 68             | 16.58            | 70   | 0.12 | 70  | 67.12* | 68            | 7.35   | 70           | 6.95   | 67       | 5.77  | 54  | 1.15* |
|                  | S3       |    | 70             | 15.92            | 70   | 0.15 | 70  | 77.35* | 69            | 7.88   | 70           | 7.51   | 69       | 5.11  | 69  | 1.26* |
|                  | S1+S2+S3 |    | 203            | 15.95            | 205  | 0.14 | 204 | 72.71* | 202           | 7.47   | 199          | 7.06   | 198      | 5.15  | 186 | 1.19* |
| Crato (larvae)   | Par      | F2 | 92             | 12.39            | 92   | 0.06 | 91  | 31.43  | 92            | 14.36  | 92           | 28.14  | 91       | 3.73  | 92  | 0.75  |
|                  | C1       | F6 | 79             | 11.34            | 80   | 0.05 | 79  | 40.47* | 80            | 21.37* | 80           | 28.79  | 75       | 3.05  | 80  | 0.60  |
|                  | C2       |    | 80             | 11.16            | 80   | 0.04 | 80  | 36.40  | 80            | 20.47* | 79           | 26.22  | 76       | 2.75  | 80  | 0.52  |
|                  | C1+C2    |    | 159            | 11.23            | 160  | 0.04 | 159 | 37.55  | 160           | 20.83* | 159          | 27.46  | 151      | 2.89  | 160 | 0.57  |
|                  | S1       | F7 | 78             | 9.24             | 79   | 0.06 | 78  | 40.22* | 79            | 20.82* | 79           | 29.61  | 69       | 3.00  | 79  | 0.84  |
|                  | S2       |    | 77             | 9.22             | 77   | 0.05 | 78  | 36.12  | 79            | 22.28* | 79           | 30.71  | 69       | 3.03  | 79  | 0.69  |
|                  | S3       |    | 80             | 8.79             | 80   | 0.05 | 79  | 38.83* | 80            | 20.02* | 80           | 33.42* | 72       | 3.07  | 80  | 0.88  |
|                  | S1+S2+S3 |    | 235            | 9.17             | 236  | 0.05 | 235 | 38.83* | 238           | 21.17* | 238          | 30.95  | 210      | 3.04  | 238 | 0.81  |
| Crato (adults)   | Par      | F2 | 171            | 17.06            | 174  | 0.14 | 120 | 32.05  | 174           | 6.63   | 173          | 6.14   | 161      | 4.03  | 163 | 1.16  |
|                  | C1       | F6 | 69             | 18.71            | 69   | 0.12 | 69  | 79.38* | 69            | 9.10*  | 69           | 9.01*  | 68       | 8.01* | 69  | 1.41* |
|                  | C2       |    | 68             | 15.53            | 70   | 0.13 | 70  | 81.44* | 70            | 8.66*  | 69           | 8.44*  | 68       | 7.09* | 69  | 1.22  |
|                  | C1+C2    |    | 137            | 17.12            | 139  | 0.12 | 139 | 83.34* | 139           | 8.73*  | 138          | 8.99*  | 136      | 7.76* | 138 | 1.30* |
|                  | S1       | F7 | 80             | 17.35            | 80   | 0.13 | 80  | 63.37* | 80            | 8.96*  | 79           | 8.20*  | 77       | 7.86* | 79  | 1.36* |
|                  | S2       |    | 70             | 17.87            | 70   | 0.11 | 70  | 75.28* | 70            | 10.24* | 70           | 10.31* | 68       | 9.11* | 70  | 1.31* |
|                  | S3       |    | 69             | 16.84            | 70   | 0.14 | 69  | 77.46* | 70            | 8.72*  | 69           | 8.31*  | 69       | 6.65* | 69  | 1.36* |
|                  | S1+S2+S3 |    | 219            | 17.32            | 220  | 0.13 | 219 | 77.99* | 220           | 9.54*  | 218          | 9.21*  | 214      | 7.60* | 218 | 1.35* |
